# Supplementary material for: Sigma 1 Receptor Contributes to Astrocyte-Mediated Retinal Ganglion Cell Protection
Source: PubMed Central journal article supplement — Invest Ophthalmol Vis Sci. 2022 Feb 1;63(2):1. doi: 10.1167/iovs.63.2.1 (PMC8819349; doi:10.1167/iovs.63.2.1), 2022-02-01
Supplement: iovs-63-2-1_s001.pdf [file iovs-63-2-1_s001.pdf]

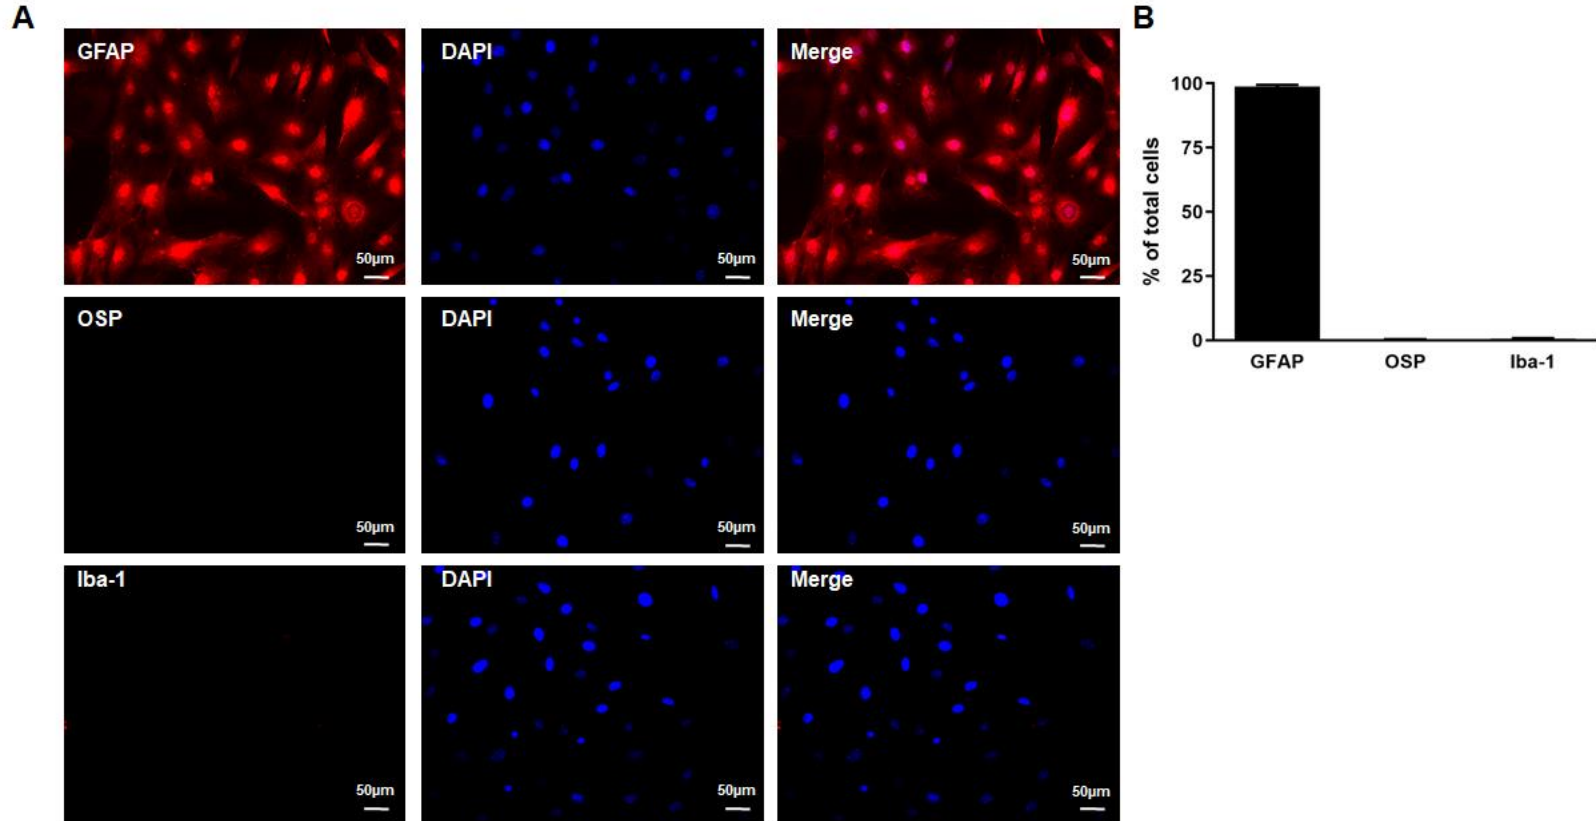

Supplementary Figure S1

**Supplementary Figure S1. Characterization of cultured primary mouse ONHAs.** (A) ONHAs were fixed and probed with antibodies against GFAP (*red*), OSP (*red*), and Iba-1 (*red*). The cells were counterstained with DAPI to label DNA (*blue*) as a marker for nuclei. *Scale bar*: 50  $\mu$ m. (B) Quantitative analysis shows that more than 95% of the cells in culture express GFAP. For each

immunofluorescence evaluation, three coverslips were quantified. Analyses were repeated in duplicate with cells isolated from different dates, different animals.
